# Supplementary material for: Simulation Analysis of Air Flow and Turbulence Statistics in a Rib Grit Roughened Duct
Source: ScientificWorldJournal. 2014 Jun 25;2014:791513. doi: 10.1155/2014/791513 (PMC4099170; doi:10.1155/2014/791513)
Supplement: Supplementary file 1 — 6 video clips demonstrating streamline patterns evolution, streamwise and transverse instantaneous velocity evolution for two different rib aspect ratios and Reynolds number 1000. [file 791513.f1.zip]

Archive with 6 entries (6 files):
- U1_1-2.avi
- U1_1-3.avi
- U2_1-2.avi
- U2_1-3.avi
- str_1-2.avi
- str_1-3.avi
